# Supplementary material
Source: PubMed Central journal article supplement (PMC2869048)
Supplement: supp_51_1_236__1.pdf [file supp_51_1_236__1.pdf]

**Table 1S.** Genes in scAAV2 HTM infected cells altered more than 2-fold

| <b>Symbol</b> | <b>Gene name</b>                                   | <b>Entrez ID</b> | <b>FC</b> |
|---------------|----------------------------------------------------|------------------|-----------|
| GDF15         | Growth differentiation factor 15                   | 9518             | 5.4       |
| GPRC5A        | G protein-coupled receptorC5A                      | 9052             | 3.2       |
| AMIGO2        | Adhesion molecule with Ig-like domain 2            | 347902           | 3.0       |
| CDKN1A        | Cyclin-dependent kinase inhibitor 1A               | 1026             | 2.8       |
| H2BFS         | H2B histone family, member S                       | 54145            | 2.4       |
| HIST1H2BK     | Histone cluster 1, H2bk                            | 85236            | 2.4       |
| PTX3          | Pentraxin-related gene 3                           | 5806             | 2.4       |
| HIST1H2AC     | Histone cluster 1, H2ac                            | 8334             | 2.4       |
| CLCA2         | Chloride channel, calcium activated 2              | 9635             | 2.3       |
| FAS           | Fas                                                | 355              | 2.1       |
| SERPING1      | Serpin peptidase inhibitor G1                      | 710              | -2.0      |
| HGF           | Hepatocyte growth factor                           | 3082             | -2.0      |
| GAS1          | Growth arrest-specific 1                           | 2619             | -2.0      |
| IDH2          | Isocitrate dehydrogenase 2                         | 3418             | -2.0      |
| PTMA          | Prothymosin, alpha                                 | 5757             | -2.0      |
| CHN1          | Chimerin 1(chimaerin) 1 (CHN1), transcript variant | 1123             | -2.0      |
| PLTP          | Phospholipid transfer protein                      | 5360             | -2.0      |
| EMX2          | Empty spiracles homeobox 2                         | 2018             | -2.0      |
| RNF138        | Ring finger protein 138                            | 51444            | -2.1      |
| MGC16619      | Septin 6                                           | 23157            | -2.1      |
| PTMA          | Prothymosin, alpha                                 | 5757             | -2.1      |
| ZWINT         | ZW10 interactor                                    | 11130            | -2.1      |
| ASMTL         | Acetylserotonin O-methyltransferase-like           | 8623             | -2.1      |
| CKAP2         | Cytoskeleton associated protein 2                  | 26586            | -2.1      |
| ATG12         | ATG12 autophagy related 12 hom. (S. cerevisiae)    | 9140             | -2.1      |
| TFAP2B        | Transcription factor AP-2 beta                     | 7021             | -2.1      |
| SOX11         | SRY (sex determining region Y)-box 11              | 6664             | -2.1      |
| KCTD12        | Potassium channel tetram domain 12                 | 115207           | -2.1      |
| PDE3A         | Phosphodiesterase 3A                               | 5139             | -2.1      |
| KIF20A        | Kinesin family member 20A                          | 10112            | -2.1      |
| MXRA5         | Matrix-remodelling associated 5                    | 25878            | -2.1      |
| TPX2          | TPX2                                               | 22974            | -2.1      |
| PTTG1         | Pituitary tumor-transforming 1                     | 9232             | -2.1      |
| MAN1A1        | Mannosidase, alpha1A1                              | 4121             | -2.1      |
| KLF10         | Kruppel-like factor 10                             | 7071             | -2.1      |
| IL1R1         | Interleukin 1 receptor I                           | 3554             | -2.1      |
| CD9           | CD9 molecule                                       | 928              | -2.2      |
| C1orf41       | Chromosome 1 open reading frame 41                 | 51668            | -2.2      |
| PIR           | Pirin                                              | 8544             | -2.2      |
| C1R           | Complement component 1r                            | 715              | -2.2      |

**Table 1S.** Genes in scAAV2 HTM infected cells altered more than 2-fold (cont')

| <b>Symbol</b> | <b>Gene name</b>                        | <b>Entrez ID</b> | <b>FC</b> |
|---------------|-----------------------------------------|------------------|-----------|
| CETN3         | Centrin 3                               | 1070             | -2.2      |
| PTGER2        | Prostaglandin E receptor 2              | 5732             | -2.2      |
| USP1          | Ubiquitin specific peptidase 1          | 7398             | -2.2      |
| CD200         | CD200 molecule                          | 4345             | -2.2      |
| BTG1          | B-cell translocation gene 1             | 694              | -2.2      |
| NID1          | Nidogen 1                               | 4811             | -2.2      |
| CDKN3         | cyclin-dependent kinase inhibitor 3     | 1033             | -2.2      |
| ISG20         | Interferon stimulated exonuclease 20    | 3669             | -2.2      |
| COL8A2        | Collagen VIII, alpha 2                  | 1296             | -2.2      |
| CDC2L6        | Cell division cycle 2-like 6            | 23097            | -2.2      |
| GMNN          | geminin, DNA replication inhibitor      | 51053            | -2.3      |
| AEBP1         | AE binding protein 1                    | 165              | -2.3      |
| C1orf80       | Chromosome 1 open reading frame 80      | 64853            | -2.3      |
| AKR1C1        | Aldo-keto reductase family 1, C1        | 1645             | -2.3      |
| NFYB          | Nuclear transcription factor Y, beta    | 4801             | -2.3      |
| RNASE4        | Ribonuclease 4                          | 6038             | -2.3      |
| HSPA2         | Heat shock 70                           | 3306             | -2.3      |
| MFAP4         | Microfibrillar-associated protein 4     | 4239             | -2.3      |
| LSM14A        | SCD6 homolog A                          | 26065            | -2.3      |
| RABGAP1       | RAB GTPase activating protein 1         | 23637            | -2.3      |
| EMILIN1       | Elastin microfibril interfacier 1       | 11117            | -2.3      |
| VEZF1         | Vascular endothelial zinc finger 1      | 7716             | -2.3      |
| CKS1B         | CDC28 protein kinase regulatory 1B      | 1163             | -2.3      |
| PCOLCE        | Procollagen C-endopeptidase enhancer    | 5118             | -2.3      |
| SFRP1         | Secreted frizzled-related protein 1     | 6422             | -2.3      |
| KIAA1199      | KIAA1199                                | 57214            | -2.4      |
| EFEMP1        | EGF-containing fibulin-like ECM 1       | 2202             | -2.4      |
| SMC3          | Structural maintenance chromosomes 3    | 9126             | -2.4      |
| S100A4        | S100 calcium binding protein A4         | 6275             | -2.4      |
| AKR1C2        | Aldo-keto reductase family 1, C2        | 1646             | -2.4      |
| PDGFRA        | Platelet-derived growth factor receptor | 5156             | -2.4      |
| SMC4          | Structural maintenance chromosomes 4    | 10051            | -2.4      |
| TBL1XR1       | Transducin (beta)-like 1X-linked recep1 | 79718            | -2.4      |
| HMMR          | Hyaluronan-mediated motility receptor   | 3161             | -2.4      |
| HLTF          | Helicase-like transcription factor      | 6596             | -2.4      |
| MYLK          | Myosin, light chain kinase              | 4638             | -2.4      |
| SORBS1        | Sorbin and SH3 domain containing 1      | 10580            | -2.5      |
| C10orf10      | Chromosome 10 open reading frame 10     | 11067            | -2.5      |
| SOCS2         | Suppressor of cytokine signaling 2      | 8835             | -2.5      |
| DBC1          | Deleted in bladder cancer 1             | 1620             | -2.5      |
| CSRP2         | Cysteine and glycine-rich protein 2     | 1466             | -2.5      |

**Table 1S. Genes in scAAV2 HTM infected cells altered more than 2-fold (cont')**

| <b>Symbol</b>   | <b>Gene name</b>                                            | <b>Entrez ID</b> | <b>FC</b> |
|-----------------|-------------------------------------------------------------|------------------|-----------|
| SCG2            | Secretogranin II                                            | 7857             | -2.5      |
| RACGAP1         | Rac GTPase activating protein 1                             | 29127            | -2.5      |
| RBPM5           | RNA binding protein multiple splicing                       | 11030            | -2.5      |
| CXCL6           | Chemokine (C-X-C motif) ligand 6                            | 6372             | -2.6      |
| MGP             | Matrix Gla protein                                          | 4256             | -2.6      |
| PBK             | PDZ binding kinase                                          | 55872            | -2.6      |
| TBL1X           | Transducin (beta)-like 1X-linked                            | 6907             | -2.6      |
| GLCE            | Glucuronic acid epimerase                                   | 26035            | -2.6      |
| FRMD4B          | FERM domain containing 4B                                   | 23150            | -2.6      |
| CDC20           | Cell division cycle 20                                      | 991              | -2.6      |
| MME             | Membrane metallo-endopeptidase                              | 4311             | -2.7      |
| PTN             | pleiotrophin (heparin binding growth factor 8)              | 5764             | -2.7      |
| SERPINF1 (PEDF) | Serpin peptidase inhibitor F 1                              | 5176             | -2.7      |
| ASPM            | Asp (abnormal spindle) homolog                              | 259266           | -2.8      |
| FBLN1           | Fibulin 1                                                   | 2192             | -2.8      |
| ATP1B1          | ATPase, Na <sup>+</sup> /K <sup>+</sup> transporting beta 1 | 481              | -2.8      |
| KIAA0101        | KIAA0101                                                    | 9768             | -2.9      |
| PSIP1           | PC4 and SFRS1 interacting protein 1                         | 11168            | -2.9      |
| DLG7            | Discs, large homolog 7                                      | 9787             | -2.9      |
| CCNB1           | Cyclin B1                                                   | 891              | -3.0      |
| AKR1C3          | Ido-keto reductase 1C3                                      | 8644             | -3.3      |
| OGN             | Osteoglycin                                                 | 4969             | -3.3      |
| CKS2            | CDC28 protein kinase regulatory 2                           | 1164             | -4.0      |
| RRM2            | ribonucleotide reductase M2 polypeptide                     | 6241             | -4.1      |
| CDC2            | Cell division cycle 2                                       | 983              | -4.1      |
| CXCL12          | Chemokine (C-X-C motif) ligand 12                           | 6387             | -4.2      |
| NUSAP1          | Nucleolar and spindle associated protein 1                  | 51203            | -4.7      |
| HMGB2           | High-mobility group box 2                                   | 3148             | -4.9      |
| TOP2A           | Topoisomerase (DNA) II alpha                                | 7153             | -5.4      |
| PRC1            | Protein regulator of cytokinesis 1                          | 9055             | -5.4      |
| ASPN            | Asporin                                                     | 54829            | -5.7      |
